# Supplementary material
Source: PubMed Central journal article supplement (PMC8925298)
Supplement: mmc2.pdf [file mmc2.pdf]

# Umfrage "Heiße Tage und Corona - Arbeits- Schutz in der Pflege"

## Worum geht es (Inhaltsverzeichnis)

**Die Umfrage – Wer sind wir und was wir machen**

**Wir schützen Ihre persönlichen Daten**

**Der Fragebogen**

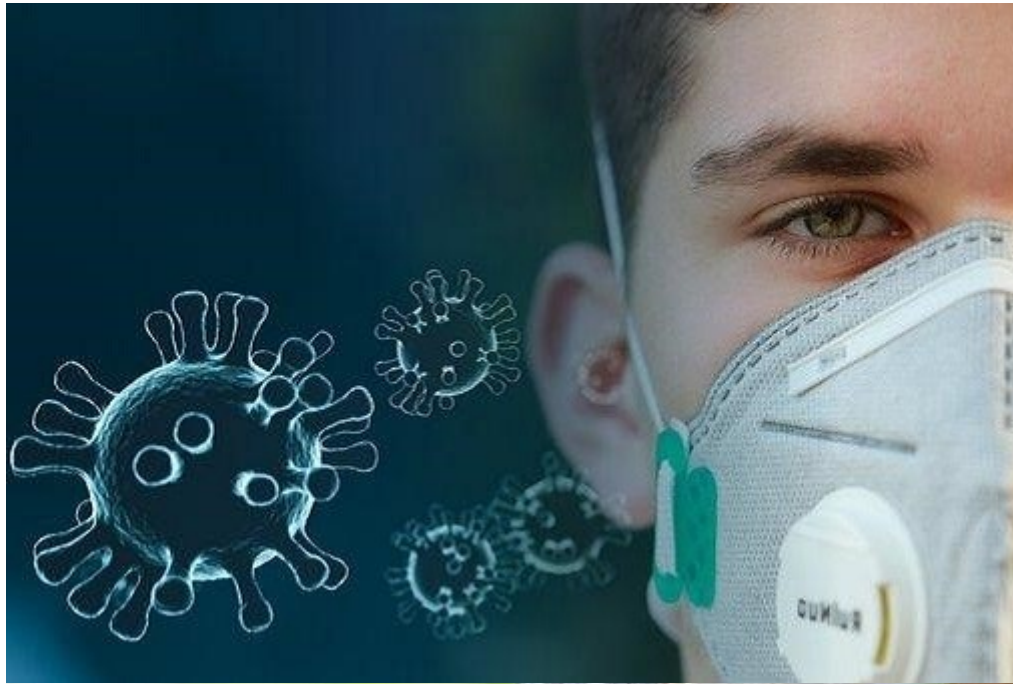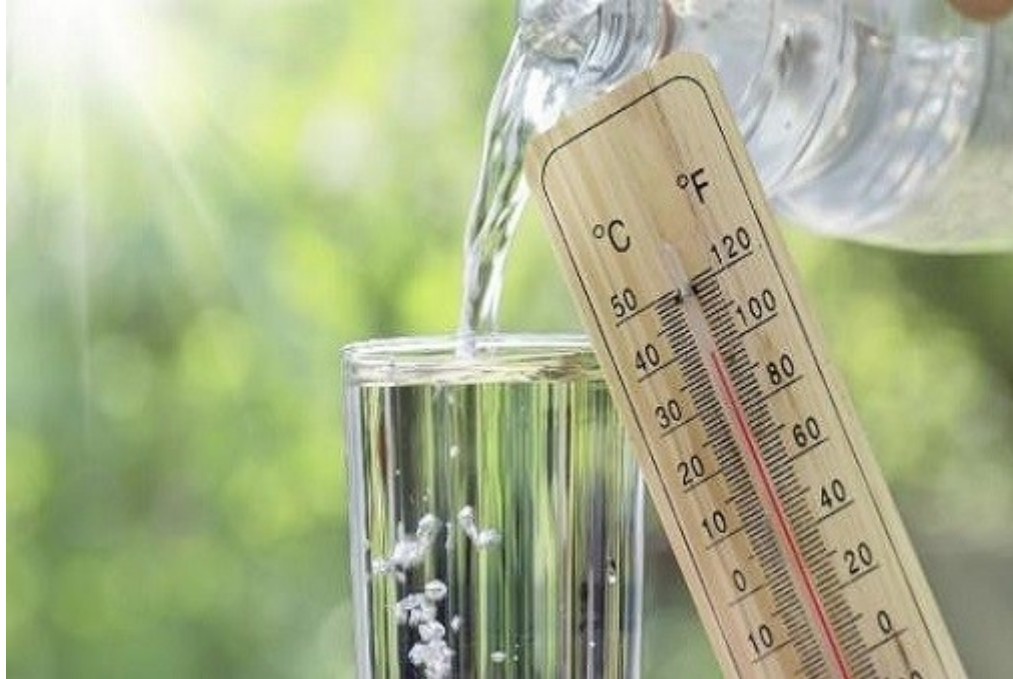

## Die Umfrage – Wer sind wir und was wir machen

Sehr geehrte Teilnehmerinnen und Teilnehmer,

Wir sind ein Team vom Universitäts-Klinikum München und führen eine Umfrage zum Thema „Arbeiten mit **Schutzkleidung**

– Strategien für Pflegekräfte während der Sommerhitze“ durch. Wir möchten herausfinden, wie Sie mit Ihrer Schutzkleidung auch an heißen Tagen gut arbeiten können.

Ihre Ansprechpartnerin bei Rückfragen ist Frau Yvette Jegodka. Sie ist selbst Gesundheits- und Krankenpflegerin. Außerdem studiert Frau Jegodka das Fach Gesundheits-Wissenschaften. Diese Umfrage ist Teil ihrer Abschluss-Arbeit.

Die Umfrage hat zwei Ziele:

- Wir wollen untersuchen, wie anstrengend die Arbeit von Pflegekräften ist und ob sich das auf die Gesundheit von Pflegekräften auswirkt.
- Wir wollen eine Lösung finden, wie man **Pflegekräfte besser schützen** kann

Bitte unterstützen Sie diese Studie und füllen Sie den Fragebogen aus.

Die Beantwortung dauert ungefähr 20 Minuten.

Wichtig ist **Ihre persönliche Meinung**. Bitte beantworten Sie die Fragen spontan und vertrauen Sie Ihrem Gefühl.

Wenn Sie Fragen haben, schreiben Sie gerne eine E-Mail an Frau Jegodka: [Yvette.Jegodka@med.uni-muenchen.de](mailto:Yvette.Jegodka@med.uni-muenchen.de)  
(mailto:Yvette.Jegodka@med.uni-muenchen.de).

Vielen Dank für Ihre Hilfe!

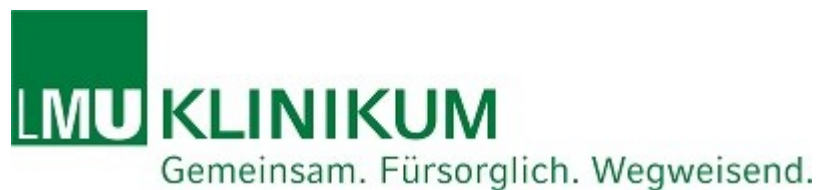

In dieser Umfrage sind 70 Fragen enthalten.

## Fragen zur aktuellen Arbeits-Situation

**Bitte beantworten Sie die folgenden Fragen zu ihrem Arbeitsplatz. Wie ist die aktuelle Situation an Ihrem Arbeitsplatz? Wie ist Ihre Arbeits-Belastung jetzt gerade?**

### Wo arbeiten Sie?

❗ Bitte wählen Sie eine der folgenden Antworten:

Bitte wählen Sie nur eine der folgenden Antworten aus:

- ☐ Krankenhaus (Intensivstation, Notaufnahme, Normalstation)
- ☐ Pflegeheim
- ☐ ambulanter Pflegedienst

## Es gibt an meinem Arbeitsplatz genug Pflegepersonal:

❗ Bitte wählen Sie eine der folgenden Antworten:

Bitte wählen Sie nur eine der folgenden Antworten aus:

- ☐ ja
- ☐ eher ja
- ☐ eher nein
- ☐ nein

## Ich bin bei der Arbeit meistens allein:

❗ Bitte wählen Sie eine der folgenden Antworten:

Bitte wählen Sie nur eine der folgenden Antworten aus:

- ☐ ja
- ☐ eher ja
- ☐ eher nein
- ☐ nein

## Es gibt genug Schutzkleidung an meinem Arbeitsplatz:

❗ Bitte wählen Sie eine der folgenden Antworten:

Bitte wählen Sie nur eine der folgenden Antworten aus:

- ☐ ja
- ☐ eher ja
- ☐ eher nein
- ☐ nein

## Wenn nicht, was fehlt?

❗ Bitte wählen Sie die zutreffenden Antworten aus:

Bitte wählen Sie alle zutreffenden Antworten aus:

- ☐ Schutzkittel
- ☐ Visier
- ☐ Schutzbrille
- ☐ Schutzhandschuhe
- ☐ OP-Haube
- ☐ FFP3-Maske
- ☐ FFP2-Maske
- ☐ medizinischer Mund-Nasen-Schutz

☐ Sonstiges:

## Gibt es an Ihrem Arbeitsplatz einen Hygiene-Plan?

❗ Bitte wählen Sie eine der folgenden Antworten:

Bitte wählen Sie nur eine der folgenden Antworten aus:

- ☐ ja
- ☐ nein
- ☐ weiß nicht

## Wann war Ihre letzte Hygiene-Schulung?

❗ Bitte wählen Sie eine der folgenden Antworten:

Bitte wählen Sie nur eine der folgenden Antworten aus:

- ☐ Ich hatte noch keine
- ☐ vor 0–4 Monaten
- ☐ vor 5–12 Monaten
- ☐ vor 13–24 Monaten
- ☐ vor über 2 Jahren
- ☐ weiß nicht

## Gibt es ein Qualitäts-Management an Ihrem Arbeitsplatz?

❗ Bitte wählen Sie eine der folgenden Antworten:

Bitte wählen Sie nur eine der folgenden Antworten aus:

- ☐ ja
- ☐ eher ja
- ☐ eher nein
- ☐ nein

## Eine gesunde Lebensweise ist mir wichtig:

❗ Bitte wählen Sie eine der folgenden Antworten:

Bitte wählen Sie nur eine der folgenden Antworten aus:

- ☐ ja
- ☐ eher ja
- ☐ eher nein
- ☐ nein

## Die Arbeit empfinde ich als körperlich anstrengend:

❗ Bitte wählen Sie eine der folgenden Antworten:

Bitte wählen Sie nur eine der folgenden Antworten aus:

- ☐ ja
- ☐ eher ja
- ☐ eher nein
- ☐ nein

## Ich fühle mich bei meiner Arbeit wertgeschätzt:

❗ Bitte wählen Sie eine der folgenden Antworten:

Bitte wählen Sie nur eine der folgenden Antworten aus:

- ☐ ja
- ☐ eher ja
- ☐ eher nein
- ☐ nein

## Leiden Sie häufig unter körperlichen Beschwerden?

❗ Bitte wählen Sie eine der folgenden Antworten:

Bitte wählen Sie nur eine der folgenden Antworten aus:

- ☐ ja
- ☐ nein

## Wenn ja, unter welchen Beschwerden leiden Sie?

❗ Bitte wählen Sie die zutreffenden Antworten aus:

Bitte wählen Sie alle zutreffenden Antworten aus:

- ☐ Rückenschmerzen
- ☐ häufige Erkältung
- ☐ Hautprobleme
- ☐ Gelenkschmerzen
- ☐ Schlafstörungen
- ☐ Magen-Darm-Beschwerden
- ☐ Nervosität
- ☐ Erschöpfung
- ☐ Kopfschmerzen
- ☐ Sonstiges:

## Haben Sie Vorerkrankungen?

❗ Bitte wählen Sie eine der folgenden Antworten:

Bitte wählen Sie nur eine der folgenden Antworten aus:

- ☐ ja
- ☐ nein

## Wenn ja, welche:

❗ Bitte wählen Sie die zutreffenden Antworten aus:

Bitte wählen Sie alle zutreffenden Antworten aus:

- ☐ Asthma
- ☐ Diabetes
- ☐ COPD
- ☐ Bluthochdruck
- ☐ Allergien

☐ Sonstiges:

## Fragen zum Arbeiten in persönlicher Schutzkleidung

Bei den folgenden Fragen ist immer die vollständige persönliche Schutzkleidung gemeint: Sie besteht aus Schutzkittel, Mund-Nasen-Schutz (medizinischem Mund-Nasen-Schutz, FFP2-Maske oder FFP3-Maske), OP-Haube, Schutzhandschuhen, Schutzbrille oder Visier.

## Ich trage immer die adäquate Schutzkleidung:

❗ Bitte wählen Sie eine der folgenden Antworten:

Bitte wählen Sie nur eine der folgenden Antworten aus:

- ☐ ja
- ☐ eher ja
- ☐ eher nein
- ☐ nein

## Wenn nein, warum nicht:

❗ Bitte wählen Sie die zutreffenden Antworten aus:

Bitte wählen Sie alle zutreffenden Antworten aus:

- ☐ Schutzkleidung nicht zertifiziert
- ☐ Ich trage dieselbe Schutzmaske öfter
- ☐ Ich trage denselben Schutzkittel öfter
- ☐ Schutzkleidung nicht zertifiziert
- ☐ Schutzkleidung unvollständig

☐ Sonstiges:

## Wie häufig tragen Sie die vollständige Schutzkleidung?

❗ Bitte wählen Sie eine der folgenden Antworten:

Bitte wählen Sie nur eine der folgenden Antworten aus:

- ☐ Täglich
- ☐ alle 2–4 Tage
- ☐ mindestens 1-mal wöchentlich
- ☐ mindestens 1-mal monatlich
- ☐ weniger als 1-mal monatlich
- ☐ gar nicht

☐ Sonstiges

## Wie lange tragen Sie täglich eine Schutzmaske? Weniger als

❗ Bitte wählen Sie eine der folgenden Antworten:

Bitte wählen Sie nur eine der folgenden Antworten aus:

☐ 1 Stunde

☐ 3 - 5 Stunden

☐ 1 - 2 Stunden

☐ 5 - 8 Stunden

☐ Sonstiges

## Welche Maske tragen sie am häufigsten?

❗ Bitte wählen Sie eine der folgenden Antworten:

Bitte wählen Sie nur eine der folgenden Antworten aus:

☐ Medizinischer Mund-Nasenschutz

☐ FFP2-Maske

☐ FFP3-Maske

☐ selbstgenähte Stoffmaske

☐ Sonstiges

## Wie oft tragen Sie pro Woche eine FFP2-Maske?

❗ Bitte wählen Sie eine der folgenden Antworten:

Bitte wählen Sie nur eine der folgenden Antworten aus:

- ☐ Täglich
- ☐ mindestens 3x pro Woche
- ☐ mehr
- ☐ weniger
- ☐ gar nicht
- ☐ Sonstiges

## Ich fühle mich mit der Schutzkleidung gut geschützt:

❗ Bitte wählen Sie eine der folgenden Antworten:

Bitte wählen Sie nur eine der folgenden Antworten aus:

- ☐ ja
- ☐ eher ja
- ☐ eher nein
- ☐ nein

## In Schutzkleidung fällt es mir schwerer, eine persönliche Beziehung zu den Patientinnen/Patienten zu haben:

❗ Bitte wählen Sie eine der folgenden Antworten:

Bitte wählen Sie nur eine der folgenden Antworten aus:

- ☐ ja
- ☐ eher ja
- ☐ eher nein
- ☐ nein

## Bei manchen Arbeiten trage ich ein Visier

❗ Bitte wählen Sie eine der folgenden Antworten:

Bitte wählen Sie nur eine der folgenden Antworten aus:

- ☐ ja
- ☐ nein

wenn ja:. Ich trage dann keine Schutzmaske und keine Schutzbrille:

❗ Bitte wählen Sie eine der folgenden Antworten:

Bitte wählen Sie nur eine der folgenden Antworten aus:

- ☐ ja
- ☐ nein

Wenn ich keine Maske trage, trage ich ein Visier:

❗ Bitte wählen Sie die zutreffenden Antworten aus:

Bitte wählen Sie alle zutreffenden Antworten aus:

- ☐ bei Gesprächen mit Menschen ohne Gehör, mit Demenz, psychischen Erkrankungen
- ☐ bei patientenfernen Aufgaben
- ☐ bei hauswirtschaftlichen Aufgaben
- ☐ bei der Dokumentation
- ☐ Sonstiges:

## Vorteile:

❗ Bitte wählen Sie die zutreffenden Antworten aus:

Bitte wählen Sie alle zutreffenden Antworten aus:

- ☐ erkennbares Lächeln
- ☐ können längere Zeit getragen werden
- ☐ sind einfacher sauber zu machen
- ☐ Visiere werden nicht durchfeuchtet
- ☐ ich fasse mir weniger ins Gesicht
- ☐ bequemer für Brillenträger
- ☐ freieres Atmen
- ☐ Einsatz von Mimik

☐ Sonstiges:

**Fragen zum Arbeiten mit persönlicher Schutzkleidung an heißen Tagen (die gefühlte Temperatur ist mindestens 32 °C an zwei Tagen hintereinander)**

**Empfinden Sie Hitze als Problem / Belastung an ihrem Arbeitsplatz?**

## ist die Arbeit in Schutzkleidung für mich anstrengender:

❗ Bitte wählen Sie eine der folgenden Antworten:

Bitte wählen Sie nur eine der folgenden Antworten aus:

- ☐ ja
- ☐ eher ja
- ☐ eher nein
- ☐ nein

## muss ich schwere Patienten allein bewegen:

❗ Bitte wählen Sie eine der folgenden Antworten:

Bitte wählen Sie nur eine der folgenden Antworten aus:

- ☐ ja
- ☐ eher ja
- ☐ eher nein
- ☐ nein

## brauche ich für die Arbeit mehr Zeit:

❗ Bitte wählen Sie eine der folgenden Antworten:

Bitte wählen Sie nur eine der folgenden Antworten aus:

- ☐ ja
- ☐ eher ja
- ☐ eher nein
- ☐ nein

## schwitze ich stärker:

❗ Bitte wählen Sie eine der folgenden Antworten:

Bitte wählen Sie nur eine der folgenden Antworten aus:

- ☐ ja
- ☐ eher ja
- ☐ eher nein
- ☐ nein

## kann ich schlechter atmen:

❗ Bitte wählen Sie eine der folgenden Antworten:

Bitte wählen Sie nur eine der folgenden Antworten aus:

- ☐ ja
- ☐ eher ja
- ☐ eher nein
- ☐ nein

## kann ich mich schlechter konzentrieren:

❗ Bitte wählen Sie eine der folgenden Antworten:

Bitte wählen Sie nur eine der folgenden Antworten aus:

- ☐ ja
- ☐ eher ja
- ☐ eher nein
- ☐ nein

## habe ich mehr Angst, Fehler zu machen:

❗ Bitte wählen Sie eine der folgenden Antworten:

Bitte wählen Sie nur eine der folgenden Antworten aus:

- ☐ ja
- ☐ eher ja
- ☐ eher nein
- ☐ nein

## kann ich meine Arbeit nicht so gut machen, wie ich will:

❗ Bitte wählen Sie eine der folgenden Antworten:

Bitte wählen Sie nur eine der folgenden Antworten aus:

- ☐ ja
- ☐ nein
- ☐ eher nein
- ☐ eher ja

## habe ich weniger Spaß bei der Arbeit:

❗ Bitte wählen Sie eine der folgenden Antworten:

Bitte wählen Sie nur eine der folgenden Antworten aus:

- ☐ ja
- ☐ nein
- ☐ eher nein
- ☐ eher ja

## finde ich das häufige Wechseln von Schutzkleidung besonders anstrengend:

❗ Bitte wählen Sie eine der folgenden Antworten:

Bitte wählen Sie nur eine der folgenden Antworten aus:

- ☐ ja
- ☐ nein
- ☐ eher nein
- ☐ eher ja

## An heißen Tagen fühle ich mich beim Arbeiten in Schutzkleidung:

Bitte wählen Sie die zutreffende Antwort für jeden Punkt aus:

|           | nervös:               | erschöpft:            | unzufrieden:          | unsicher:             | gereizt:              |
|-----------|-----------------------|-----------------------|-----------------------|-----------------------|-----------------------|
| ja        | <input type="radio"/> |
| eher ja   | <input type="radio"/> |
| eher nein | <input type="radio"/> |
| nein      | <input type="radio"/> |

## An heißen Tagen leide ich beim Arbeiten in Schutzkleidung unter:

Bitte wählen Sie die zutreffende Antwort für jeden Punkt aus:

|                                | ja                    | eher ja               | eher nein             | nein                  |
|--------------------------------|-----------------------|-----------------------|-----------------------|-----------------------|
| <b>Kurzatmigkeit:</b>          | <input type="radio"/> | <input type="radio"/> | <input type="radio"/> | <input type="radio"/> |
| <b>Kopfschmerzen:</b>          | <input type="radio"/> | <input type="radio"/> | <input type="radio"/> | <input type="radio"/> |
| <b>Schwindel:</b>              | <input type="radio"/> | <input type="radio"/> | <input type="radio"/> | <input type="radio"/> |
| <b>Erschöpfung:</b>            | <input type="radio"/> | <input type="radio"/> | <input type="radio"/> | <input type="radio"/> |
| <b>Magen-Darm-Beschwerden:</b> | <input type="radio"/> | <input type="radio"/> | <input type="radio"/> | <input type="radio"/> |
| <b>Hautprobleme:</b>           | <input type="radio"/> | <input type="radio"/> | <input type="radio"/> | <input type="radio"/> |
| <b>Müdigkeit:</b>              | <input type="radio"/> | <input type="radio"/> | <input type="radio"/> | <input type="radio"/> |

## Fragen zum Arbeitsschutz, wenn Sie die persönliche Schutzkleidung an heißen Tagen tragen

Die folgenden Fragen beziehen sich auf den Arbeitsschutz an heißen Arbeitstagen. Was tut Ihre Arbeitgeberin /Ihr Arbeitgeber für Ihren Schutz? Wie schützen Sie sich selbst bei der Arbeit?

## An heißen Tagen beim Arbeiten in Schutzkleidung:

Bitte wählen Sie die zutreffende Antwort für jeden Punkt aus:

|                                                                              | ja                    | eher ja               | eher nein             | nein                  |
|------------------------------------------------------------------------------|-----------------------|-----------------------|-----------------------|-----------------------|
| kann ich längere Pausen machen / mehr Pausen:                                | <input type="radio"/> | <input type="radio"/> | <input type="radio"/> | <input type="radio"/> |
| kann ich anstrengende Arbeiten am kühlen Morgen oder am Abend machen:        | <input type="radio"/> | <input type="radio"/> | <input type="radio"/> | <input type="radio"/> |
| werden Änderungen in der Pflege-Planung gemacht:                             | <input type="radio"/> | <input type="radio"/> | <input type="radio"/> | <input type="radio"/> |
| wird zusätzliches Pflegepersonal eingesetzt:                                 | <input type="radio"/> | <input type="radio"/> | <input type="radio"/> | <input type="radio"/> |
| sind genug Kolleginnen /Kollegen da, um mir zu helfen:                       | <input type="radio"/> | <input type="radio"/> | <input type="radio"/> | <input type="radio"/> |
| trinke ich mehr:                                                             | <input type="radio"/> | <input type="radio"/> | <input type="radio"/> | <input type="radio"/> |
| stehen mir mehr Getränke zu Verfügung:                                       | <input type="radio"/> | <input type="radio"/> | <input type="radio"/> | <input type="radio"/> |
| für den ambulanten Bereich: An heißen Tagen habe ich kürzere Einsatz-Touren: | <input type="radio"/> | <input type="radio"/> | <input type="radio"/> | <input type="radio"/> |

## An heißen Tagen muss ich beim Arbeiten in Schutzkleidung neue Prioritäten setzen:

❗ Bitte wählen Sie eine der folgenden Antworten:

Bitte wählen Sie nur eine der folgenden Antworten aus:

- ☐ ja
- ☐ eher ja
- ☐ eher nein
- ☐ nein

## Wenn ja, welche Aufgabe reduziere ich?

❗ Bitte wählen Sie die zutreffenden Antworten aus:

Bitte wählen Sie alle zutreffenden Antworten aus:

- ☐ Körperpflege
- ☐ Reinigungsarbeiten
- ☐ Atemtherapie
- ☐ Gespräche
- ☐ Mobilisation

☐ Sonstiges:

## An heißen Tagen organisiere ich meine Arbeit anders:

❗ Bitte wählen Sie eine der folgenden Antworten:

Bitte wählen Sie nur eine der folgenden Antworten aus:

- ☐ ja
- ☐ nein

## Wenn ja, wie?

❗ Bitte wählen Sie die zutreffenden Antworten aus:

Bitte wählen Sie alle zutreffenden Antworten aus:

- ☐ Ich erledige mehrere Arbeiten zusammen, um die Schutzkleidung nur kurz zu tragen
- ☐ Ich lüfte in den kühlen Stunden am Morgen und Abend
- ☐ Ich Sorge für mehr Schatten durch Vorhänge, Jalousien
- ☐ Sonstiges:

## An meinem Arbeitsplatz sind Thermometer vorhanden:

❗ Bitte wählen Sie eine der folgenden Antworten:

Bitte wählen Sie nur eine der folgenden Antworten aus:

- ☐ ja
- ☐ nein
- ☐ weiß nicht

## Wenn ja, wo?

❗ Bitte wählen Sie die zutreffenden Antworten aus:

Bitte wählen Sie alle zutreffenden Antworten aus:

- ☐ In den Patientenzimmern bzw. Bewohnerzimmern
- ☐ in den Sozialräumen
- ☐ in den Arbeitsräumen
- ☐ in den Aufenthalts-Räumen

☐ Sonstiges:

## An heißen Tagen stehen am Arbeitsplatz Kühl-Geräte zur Verfügung:

❗ Bitte wählen Sie eine der folgenden Antworten:

Bitte wählen Sie nur eine der folgenden Antworten aus:

- ☐ ja
- ☐ nein
- ☐ weiß nicht

## Wenn ja, welche?

❗ Bitte wählen Sie die zutreffenden Antworten aus:

Bitte wählen Sie alle zutreffenden Antworten aus:

- ☐ Klima-Anlage
- ☐ gar nichts
- ☐ Ventilatoren
- ☐ Flächen-Kühlsystem in der Decke, in der Wand
- ☐ mobiles Klimagerät

☐ Sonstiges:

## An heißen Tagen beim Arbeiten in Schutzkleidung:

Bitte wählen Sie die zutreffende Antwort für jeden Punkt aus:

|                                                                      | ja                    | eher ja               | eher nein             | nein                  |
|----------------------------------------------------------------------|-----------------------|-----------------------|-----------------------|-----------------------|
| trinke ich weniger, damit ich nicht so häufig auf die Toilette muss: | <input type="radio"/> | <input type="radio"/> | <input type="radio"/> | <input type="radio"/> |
| trinke ich mehr:                                                     | <input type="radio"/> | <input type="radio"/> | <input type="radio"/> | <input type="radio"/> |

## An heißen Tagen beim Arbeiten in Schutzkleidung schütze ich mich persönlich durch:

❗ Bitte wählen Sie die zutreffenden Antworten aus:

Bitte wählen Sie alle zutreffenden Antworten aus:

- ☐ einen Trinkplan
- ☐ an einen kühleren Ort gehen
- ☐ kalte Umschläge in der Pause
- ☐ kühlendes Essen

☐ Sonstiges:

## An heißen Tagen beim Arbeiten in Schutzkleidung kann ich meine Arbeitspausen an einem kühlen Ort machen:

❗ Bitte wählen Sie eine der folgenden Antworten:

Bitte wählen Sie nur eine der folgenden Antworten aus:

- ☐ ja
- ☐ nein

## Wenn ja, wo?

❗ Bitte wählen Sie die zutreffenden Antworten aus:

Bitte wählen Sie alle zutreffenden Antworten aus:

- ☐ im kühlen Pausenraum
- ☐ im Garten unter Bäumen
- ☐ auf der Terrasse mit Sonnenschutz
- ☐ im Auto mit Klimaanlage

☐ Sonstiges:

## Ich kenne einen Hitzeschutzaktionsplan für meinen Arbeitsbereich:

❗ Bitte wählen Sie eine der folgenden Antworten:

Bitte wählen Sie nur eine der folgenden Antworten aus:

- ☐ ja
- ☐ nein
- ☐ weiß nicht

## Wenn ja: Ich fühle mich durch den Hitzeschutzaktionsplan gut bei meiner Arbeit geschützt:

❗ Bitte wählen Sie eine der folgenden Antworten:

Bitte wählen Sie nur eine der folgenden Antworten aus:

- ☐ ja
- ☐ nein
- ☐ weiß nicht

## An meinem Arbeitsplatz wird über Hitzewarnungen informiert:

❗ Bitte wählen Sie eine der folgenden Antworten:

Bitte wählen Sie nur eine der folgenden Antworten aus:

- ☐ ja
- ☐ nein
- ☐ weiß nicht

## Wenn ja, wie?

❗ Bitte wählen Sie die zutreffenden Antworten aus:

Bitte wählen Sie alle zutreffenden Antworten aus:

- ☐ durch Aushänge
- ☐ durch die Wohnbereichsleitung oder Stationsleitung persönlich
- ☐ Newsletter
- ☐ per App

☐ Sonstiges:

## An meinem Arbeitsplatz gibt es regelmäßige Schulungen zum Hitzeschutz:

❗ Bitte wählen Sie eine der folgenden Antworten:

Bitte wählen Sie nur eine der folgenden Antworten aus:

- ☐ ja
- ☐ eher ja
- ☐ eher nein
- ☐ nein

## Wenn ja, wo?

❗ Bitte wählen Sie eine der folgenden Antworten:

Bitte wählen Sie nur eine der folgenden Antworten aus:

- ☐ am Arbeitsplatz
- ☐ online

☐ Sonstiges

## Wenn ja: Sind Sie mit der Schulung zum Schutz vor Hitze zufrieden:

❗ Bitte wählen Sie eine der folgenden Antworten:

Bitte wählen Sie nur eine der folgenden Antworten aus:

- ☐ ja
- ☐ eher ja
- ☐ eher nein
- ☐ nein

## Begründung:

❗ Bitte wählen Sie die zutreffenden Antworten aus:

Bitte wählen Sie alle zutreffenden Antworten aus:

- ☐ gut verständlich
- ☐ Ich fühle mich danach eher unsicher
- ☐ Ich fühle mich danach eher sicherer
- ☐ nicht hilfreich
- ☐ hilfreich
- ☐ nicht informativ
- ☐ informativ
- ☐ schlecht verständlich

☐ Sonstiges:

## Welches Thema zum Schutz vor Hitze bei der Arbeit interessiert Sie am meisten?

❗ Bitte wählen Sie eine der folgenden Antworten:

Bitte wählen Sie nur eine der folgenden Antworten aus:

- ☐ Hitzeschulung
- ☐ Hitze-Erkrankungen
- ☐ Hitze-Schutzkleidung
- ☐ Hitzewarnung
- ☐ Internationale Erfahrungen im Umgang mit Hitze am Arbeitsplatz
- ☐ Sonstiges

## Informationen zu Ihrer Person

## Welchen Beruf haben Sie?

❗ Bitte wählen Sie eine der folgenden Antworten:

Bitte wählen Sie nur eine der folgenden Antworten aus:

- ☐ Pflegefachkraft mit 3-jähriger Ausbildung
- ☐ Pflegefachkraft mit 1-jähriger Ausbildung
- ☐ Pflegehelfer\*in
- ☐ Auszubildende\*r
- ☐ Altenpfleger\*in

## In welchem Arbeits-Verhältnis sind Sie?

❗ Bitte wählen Sie eine der folgenden Antworten:

Bitte wählen Sie nur eine der folgenden Antworten aus:

- ☐ direkt angestellt
- ☐ Leasing-Kraft
- ☐ selbstständig
- ☐ ehrenamtlich tätig
- ☐ Praktikant\*in

## In welchem Umfang arbeiten Sie?

❗ Bitte wählen Sie eine der folgenden Antworten:

Bitte wählen Sie nur eine der folgenden Antworten aus:

- ☐ Vollzeit
- ☐ Teilzeit
- ☐ Minijob

## Wo befindet sich die Einrichtung?

❗ Bitte wählen Sie eine der folgenden Antworten:

Bitte wählen Sie nur eine der folgenden Antworten aus:

- ☐ auf dem Land
- ☐ im Stadtzentrum
- ☐ am Stadtrand

## Wie lange arbeiten Sie schon in der Pflege?

❗ Bitte wählen Sie eine der folgenden Antworten:

Bitte wählen Sie nur eine der folgenden Antworten aus:

- ☐ 0–11 Monate
- ☐ 1–2 Jahre
- ☐ 3–5 Jahre
- ☐ 6–10 Jahre
- ☐ 11–20 Jahre
- ☐ länger als 20 Jahre

## Wie lange arbeiten Sie schon in Deutschland in der Pflege?

❗ Bitte wählen Sie eine der folgenden Antworten:

Bitte wählen Sie nur eine der folgenden Antworten aus:

- ☐ 0–6 Monate
- ☐ 7–11 Monate
- ☐ 1–2 Jahre
- ☐ 3–5 Jahre
- ☐ 6–10 Jahre
- ☐ 11–20 Jahre
- ☐ länger als 20 Jahre

## Wie gut sind Ihre Deutsch-Kenntnisse?

❗ Bitte wählen Sie eine der folgenden Antworten:

Bitte wählen Sie nur eine der folgenden Antworten aus:

- ☐ Basis-Kenntnisse
- ☐ gute Kenntnisse
- ☐ sehr gute Kenntnisse
- ☐ Muttersprache

## Wie alt sind Sie?

❗ Bitte wählen Sie eine der folgenden Antworten:

Bitte wählen Sie nur eine der folgenden Antworten aus:

- ☐ 16–25 Jahre
- ☐ 26–35 Jahre
- ☐ 36–45 Jahre
- ☐ 45–55 Jahre
- ☐ 56–65 Jahre
- ☐ 65+

## Welches Geschlecht haben Sie?

❗ Bitte wählen Sie eine der folgenden Antworten:

Bitte wählen Sie nur eine der folgenden Antworten aus:

- ☐ männlich
- ☐ weiblich

Vielen Dank für Ihre Teilnahme!

Wenn Sie Interesse an den Ergebnissen haben, können Sie diese ab Januar 2021 auf der Homepage des Instituts finden  
<http://www.klinikum.uni-muenchen.de/Bildungsmodule-Aerzte/de/Co-HEAT/index.html>.

LMU Klinikum

Institut und Poliklinik für Arbeits-, Sozial- und Umweltmedizin

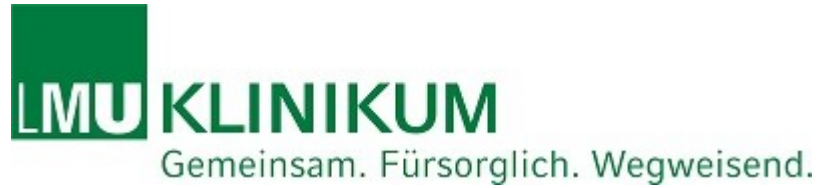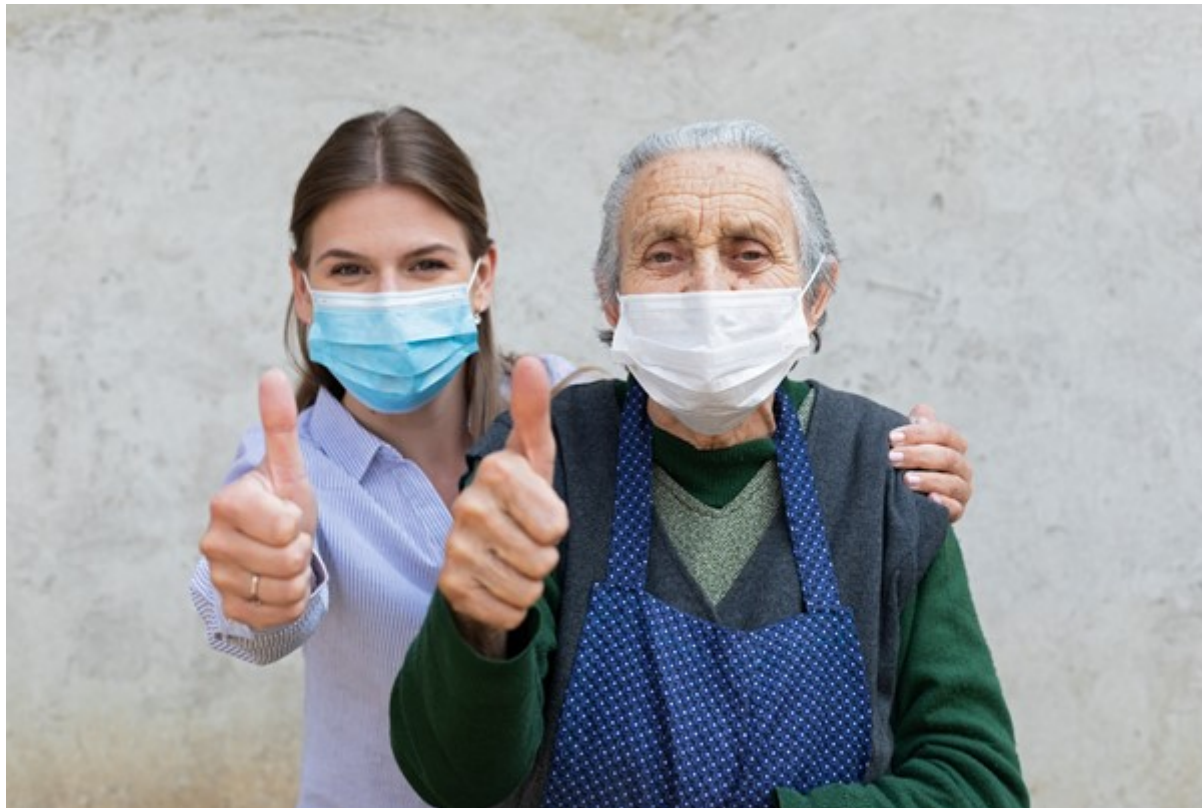

Übermittlung Ihres ausgefüllten Fragebogens:

Vielen Dank für die Beantwortung des Fragebogens.
